# Supplementary material for: Whole-rock and zircon evidence for evolution of the Late Jurassic high-Sr ∕ Y Zhoujiapuzi granite, Liaodong Peninsula, North China Craton
Source: Copernicus journal article supplement (doi:10.5194/se-13-1259-2022), 2022-08-12
Supplement: Supplementary file 1 [file se-13-1259-2022-supplement.zip]

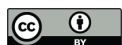

*Supplement of*

**Whole-rock and zircon evidence for evolution of the  
Late Jurassic high-Sr / Y Zhoujiapuzi granite,  
Liaodong Peninsula, North China Craton**

**Renyu Zeng et al.**

*Correspondence to:* Renyu Zeng (zengrenyu@126.com)

- se-13-1259-2022-supplement-title-page.pdf
- Table S1.docx
- Table S2.docx
- Table S3.xlsx
- Table S4.xlsx
- Table S5.xlsx

The copyright of individual parts of the supplement might differ from the article licence.
