# Supplementary material for: Whole-rock and zircon evidence for evolution of the Late Jurassic high-Sr ∕ Y Zhoujiapuzi granite, Liaodong Peninsula, North China Craton
Source: Copernicus journal article supplement (doi:10.5194/se-13-1259-2022), 2022-08-12
Supplement: Supplementary file 2 [file Table S2.docx]

**Table S2.** Raman microprobe data

| Analysis | Spot type | v3 (SiO4)(cm-1) | b (cm-1) |
| --- | --- | --- | --- |
| 1 | LSZ | 1004 | 9.0 |
| 2 | LSZ | 1004 | 7.2 |
| 3 | ESZ | 1007 | 7.4 |
| 4 | ESZ | 1007 | 6.0 |
| 5 | LSZ | 1005 | 7.1 |
| 6 | LSZ | 1007 | 5.4 |
| 7 | ESZ | 1005 | 8.1 |
| 8 | ESZ | 1006 | 7.2 |
| 9 | LSZ | 1004 | 9.2 |
| 10 | ESZ | 1007 | 7.0 |
| 11 | LSZ | 1006 | 8.3 |
| b real half-width of the v3(SiO4) Raman band | | | |

Spot type: ESZ- early stage of zircon; LSZ- late stage of zircon; IZ-inherited zircon
