# Supplementary material for: Whole-rock and zircon evidence for evolution of the Late Jurassic high-Sr ∕ Y Zhoujiapuzi granite, Liaodong Peninsula, North China Craton
Source: Copernicus journal article supplement (doi:10.5194/se-13-1259-2022), 2022-08-12
Supplement: Supplementary file 3 [file Table S3.xlsx]

## Sheet: zrc samples
Table S3 The zircon major element (wt. %) and trace element (ppm) from the Zhoujiapuzi granite
Analysis		Spot type	SiO2	ZrO2	P	Ca	Sc	Ti	Y	Nb	La	Ce	Pr	Nd	Sm	Eu	Gd	Tb	Dy	Ho	Er	Tm	Yb	Lu	Hf	Ta
XY-001 Latitude: N 40°19'11.22″; Longtitude: E123°39'02.11″
XY-001-12		LC	33.48	65.33	144.85	0	252.94	3.9	279.02	0.79	0.08	5.13	0.15	2.07	3.49	0.81	13.3	3.19	28.62	8.45	30.79	5.5	50.85	8.52	8862.07	0.27
XY-001-13		DR	31.87	65.74	329.51	0	339.33	2.17	1521.47	8.77	0	6.32	0.03	0.66	2.06	0.28	21.23	8.97	120.25	46.12	211.7	45.16	464.44	77.02	14734.4	3.98
XY-001-19		DR	32.16	65.43	416	2.55	354.66	2.5	1602.65	9.18	0.11	6.89	0.16	1.63	3.62	0.43	25.39	10.26	131.72	48.95	218.48	46.32	459.05	73.59	14773.4	3.51
XY-001-24		LC	32.95	65.61	312.23	79.27	358.82	7.04	651.31	1.75	0.01	6.37	0.16	2.66	4.8	0.7	23.24	6.22	60.73	19.54	80.27	15.31	148.65	25.95	9752.01	0.48
XY-001-25		LC	32.19	65.29	566.38	95.64	388.75	1.44	1875.54	11.58	0	5.9	0.02	0.53	2.95	0.23	24.85	11.13	150.41	56.54	260.9	54.77	548	87.51	14590.6	4.52
XY-001-31		DR	32.44	65.26	317.7	14.65	266.54	0.18	814.3	4.5	0	2.57	0.01	0.28	1.17	0.09	9.96	4.56	62.93	23.85	113.43	25.47	266.14	45.33	15165.4	3.26
XY-001-34		DR	32.16	63.74	983.32	162.29	327.2	0.63	2111.13	12.85	0.01	2.64	0.02	0.19	1.38	0.13	16.4	9.36	146.96	61.52	313.22	76.58	857.57	145.83	22668.8	12.88
XY-001-36		LC	31.69	66.69	277.49	29.57	457.37	3.94	596.26	2.03	0	3.65	0.08	1.44	3.62	0.34	17.9	5.41	54.13	17.49	73.58	13.92	142.07	23.3	11397.2	0.49
XY-001-37		IC	31.62	66.85	189.13	0	316.72	3.56	1239.52	3.97	0.02	9.61	0.09	1.63	3.72	0.4	22.65	7.79	99.02	37.72	175.27	34.7	358.24	58.6	9105.56	1.34
XY-001-38		DR	33.72	64.26	244.09	0	418.06	4.54	1135.59	5.74	0	4.57	0.05	0.84	2.27	0.31	17.23	6.46	87.62	33.9	159.74	32.34	345.58	56.25	13386.5	1.92
XY-001-39		LC	33.02	65.53	290.11	23.6	447.77	7.09	783.81	2.58	0.01	5.79	0.12	2.29	4.5	0.77	21.09	6.02	65.58	22.75	100.82	19.56	204.97	35.65	9558.99	0.5
XY-001-40		LC	31.72	66.28	528.33	0	614.1	6.35	1650.16	5.16	0.01	5.91	0.12	2.29	5.65	0.6	32.55	11	131.04	48.8	229.94	47.52	511.73	87.69	11499.1	1.41
XY-001-41		LC	31.76	67.03	164.86	0	400.52	8.53	310.85	1.25	0.01	1.89	0.06	0.93	1.81	0.75	9.02	2.47	26.83	9.06	38.58	7.64	79.83	13.89	8850.52	0.17
XY-001-42		DR	33.13	64.37	432.48	0	412.57	1.91	1236.88	9.09	0.18	2.84	0.15	0.89	1.41	0.19	13.37	6.18	90.53	35.77	176.35	36.98	395.64	64.09	16105.1	3.96
XY-001-43		DR	31.03	66.67	509.64	62.8	521.66	3.28	1674.25	6.39	0.01	5.7	0.09	1.38	4.53	0.47	31.18	10.95	136.67	48.38	224.94	44.75	469.28	76.52	13952.7	2.61
XY-001-44		LC	33.22	65.34	267.62	117.87	466.51	6.29	667.78	2.16	0.01	5.8	0.15	2.93	5.47	0.97	22.67	5.61	58.16	19.83	86.87	16.84	178.94	32.02	9576.33	0.48
XY-001-45		DR	32	66.07	71.86	0	354.69	1.3	432.04	3.55	0	1.39	0	0.09	0.46	0.07	5.09	2.24	30.85	12.21	61.56	14.07	168.32	30.94	13845.8	1.7
XY-001-46		DR	31.42	66.46	123.64	0	365.91	1.24	562.3	4.26	0	1.34	0.01	0.06	0.5	0.07	5.55	2.51	37.58	15.23	82.34	19.7	236.08	44.02	14729.6	2.63
XY-001-48		DR	30.63	67.36	105.74	0	371.62	0.82	583.03	4.02	0	1.56	0.01	0.11	0.68	0.1	6.87	2.92	40.91	16.31	83.81	18.37	215.17	38.4	14368.9	1.93
XY-001-49		IC	32.95	65.57	145.7	0	312.12	4.57	1323.7	3.39	0.98	34.5	0.78	5.57	6.4	0.52	27.26	8.66	110.94	40.97	183.29	35.38	357.65	58.87	8783.5	1.11
XY-001-51		DR	34.2	62.42	683.02	128.59	424.62	0.3	1998.67	13.09	0.03	2.36	0.03	0.5	1.18	0.12	15.56	8.32	135.75	56.24	297.54	68.64	775.76	131.82	19080.3	9.27
XY-001-52		LC	32.51	66.26	104.63	55.7	368.66	9.58	273.79	1.42	0	3.71	0.09	1.73	2.9	0.86	11.3	2.7	26.08	8.05	32.08	5.85	58.23	9.75	9159.59	0.24
XY-001-53		IC	31.64	66.78	162.38	7.79	309.29	2.49	1151.6	4.62	0	10.85	0.07	1.47	3.39	0.24	20.31	7.01	91.76	34.55	163.83	32.13	334.04	55	9729.14	1.6
XY-001-54		LC	32.12	66.3	179.01	38.93	309.99	2.39	1174.12	4.56	0	10.81	0.06	1.55	3.58	0.26	21.12	7.35	93.53	35.76	168.05	32.77	338.67	56.43	9576.64	1.56
XY-008 Latitude: N 40°19'12″; Longtitude: E123°43'4″
XY-008-04		LC	32.19	66.51	181.13	41.48	306.98	4.85	427.55	1.12	0.01	6	0.11	2.23	3.9	1.04	16.87	4.21	40.6	12.73	48.93	9.17	85.09	14.76	9342.15	0.34
XY-008-16		LC	32.05	65.38	213.55	0	237.85	0.88	1018.8	20.89	0	1.97	0	0.02	0.41	0.07	4.28	2.75	54.24	27.02	164.46	41.97	493.7	91.31	14869.1	23.16
XY-008-17		DR	32.06	66.2	123.64	30.24	271.86	2.56	695.61	1.97	0	3.51	0.1	1.39	3.14	0.45	16.84	5.28	62.24	20.88	85.64	17.06	160.68	25.46	12386.3	0.76
XY-008-24		LC	33.24	65.06	199.73	165.43	285.65	6.8	828.55	1.98	0	6.32	0.09	1.98	5.23	0.62	25.57	7.32	80.16	26.44	110.56	21.36	212.62	35.4	11702.1	0.75
XY-008-28		LC	31.65	66.44	357.44	0	292	3.26	619.25	1.57	0.02	1.65	0.01	0.22	0.88	0.14	9.92	4.06	48.98	18.95	86.82	18.85	205.44	37.56	12512.5	1.35
XY-008-36		LC	31.9	66.46	221.15	17.42	407.58	2.6	464.66	2	0.02	2.74	0.04	0.86	2.12	0.18	12.28	3.83	42.68	13.86	58.68	11.14	113.29	18.69	11878.3	0.54
XY-008-37		LC	31.72	66.48	307.32	94.32	462.09	4.4	557.18	1.95	0.01	1.52	0.04	0.78	2.57	0.16	16.53	5.29	53.53	16.02	64.1	11.81	115.33	18.79	12812.7	0.55
XY-008-38		DR	33.2	64.33	149.03	40.34	322.98	0.83	736.78	12.11	0.01	1.79	0	0.04	0.29	0.08	3.33	1.91	33.53	17.15	114.49	32.64	434.28	84.69	14741.3	12.29
XY-008-39		LC	31.84	66.38	1221.64	2029.4	362.79	7.44	512.77	1.76	10.95	30.13	3.15	16.95	9.05	2.53	26.46	5.85	52.1	14.97	56.72	9.89	95.86	15.29	8746.81	0.36
XY-008-40		IC	33.79	64.73	374.78	368.5	299.37	4.05	888.24	4	0.06	13.24	0.64	3.59	3.02	0.31	16.52	5.42	71.49	26.9	126.48	25.76	262.46	44.22	8762.53	1.21
XY-008-41		IC	31.96	66.11	626.1	1059.52	307.4	5.94	2287.44	3.5	0.02	28.79	0.73	5.88	10.7	0.91	51.92	16.07	194.79	70.93	314.27	59.46	584.56	94.2	8495.86	1.19
XY-008-42		LC	32.25	66.49	79.91	211.81	332.07	8.81	84.14	1.18	0	1.58	0.02	0.24	0.56	0.22	2.25	0.68	6.86	2.28	9.53	1.84	19.62	3.29	9583.78	0.19
XY-008-43		DR	33.39	64.07	174.65	0	330.08	0	883.28	16.74	0	1.57	0	0.07	0.34	0.06	4.15	2.55	47.74	23.14	141.54	36.56	439.09	78.18	15642.7	18.26
XY-008-45		LC	32.04	66.55	285.23	0	447.84	4.7	743.81	1.87	0.01	5.37	0.12	2.32	4.23	0.87	19.89	6.01	66.98	22.46	96.16	18.38	184.92	30.95	9453.41	0.35
XY-008-46		DR	32.13	65.61	220.24	70.3	414.96	3.11	1714.57	10.75	0.05	8.98	0.05	0.78	3.38	0.36	25.73	10.53	142.21	52.02	235	46.31	462.76	72.27	13838.7	2.93
XY-008-48		LC	32.21	66.44	230.88	101.55	439.13	11.94	704.21	2.29	0.34	7.46	0.19	2.77	4.52	1.11	20.18	5.69	60.73	20.48	90.16	17.29	174.34	29.76	8864.42	0.37
XY-008-49		IC	32.18	65.72	188.22	17	303.61	15.26	2392.69	13.39	0.02	25.16	0.18	3.73	7.29	0.42	45.32	15.53	203.81	74.54	338.67	64.94	635.78	101.17	10334.8	3.93
XY-008-50		LC	32.12	66.49	221.98	0	437.05	6.42	573.19	1.68	0	3.51	0.11	1.41	3.43	0.58	15.15	4.53	50.14	16.95	75.33	14.99	154.73	26.97	9696.73	0.32
XY-008-51		DR	32.77	64.2	402.02	0	445.13	1.56	2427.94	21.04	0	5.94	0.02	0.48	3.11	0.28	29.9	13.47	193.99	70.41	330.03	67.84	703.63	110.26	16793.5	8.11
XY-008-52		LC	32.49	66.14	160.57	0	376.17	3.06	427.53	1.82	0	4.12	0.04	0.78	1.9	0.4	9.38	2.98	34.73	12.48	58.15	11.69	123.29	21.68	9975.2	0.34
Sample location: XY-001, Latitude E123°39'02″, Longtitude N 40°19'11″; XY-008, Latitude E123°42′51″, Longtitude N40°19′29″
Spot type: LC- light-CL core; DR- dark-CL rim; IC- inherited core

## Sheet: Reference Materials
Contents (AYCF)		SiO2	ZrO2		P	Ca	Sc	Ti	Y	Nb	La	Ce	Pr	Nd	Sm	Eu	Gd	Tb	Dy	Ho	Er	Tm	Yb	Lu	Hf	Ta	Pb	Th	U
		wt%	wt%		ppm	ppm	ppm	ppm	ppm	ppm	ppm	ppm	ppm	ppm	ppm	ppm	ppm	ppm	ppm	ppm	ppm	ppm	ppm	ppm	ppm	ppm	ppm	ppm	ppm
91500std		32.8293	66.357		34.8608	0	311.805	3.15794	129.148	1.52745	0.0020641	2.04884	0.0125418	0.155752	0.273706	0.190043	1.60965	0.662323	9.76134	3.95207	21.2931	5.12019	63.3816	11.0578	6021.52	0.499799	13.1913	24.8286	70.9914
91500std		32.6289	66.5548		1.5894	0	308.663	3.50088	136.109	1.59737	0	2.20169	0.0133302	0.142364	0.374111	0.180915	2.00096	0.708006	9.97992	4.06711	22.0615	5.46958	66.19	11.7977	6089.1	0.454729	13.8899	27.0071	75.6403
91500std		32.9081	66.2786		16.2309	0	306.494	3.28459	133.717	1.4215	0.00140207	2.10178	0.00792818	0.192175	0.406286	0.191326	1.94839	0.720441	9.66827	4.01618	21.8344	5.40338	65.9728	11.5705	6040.71	0.487528	14.2709	26.9097	75.6379
91500std		32.6713	66.5213		22.122	0	309.141	3.24418	130.919	1.50026	0.00211381	2.10001	0.00516356	0.18687	0.293245	0.176229	1.83108	0.706429	9.83203	3.86197	21.618	5.23511	64.6352	11.4362	5988.94	0.50934	13.4073	25.1599	72.2634
91500std		32.979	66.2292		5.52434	0	310.642	2.66962	130.534	1.43656	0.00071125	2.10518	0.0163771	0.153653	0.433612	0.195761	1.79891	0.686358	9.50318	3.88789	20.9594	5.34936	64.1082	11.1426	5890.48	0.479686	13.4592	25.0389	72.2892
91500std		32.635	66.55		25.3395	71.8086	306.917	2.94441	132.923	1.37658	0	2.17856	0.00549217	0.15772	0.325184	0.181042	2.05463	0.646812	9.5101	4.05745	21.8253	5.31772	65.0562	11.393	5958.15	0.479139	13.8595	26.2242	73.9767
91500std		32.9706	66.2328		12.0625	3.37951	306.06	4.59032	131.565	1.51325	0.00354736	2.1561	0.0122705	0.173072	0.31474	0.18855	1.83042	0.655401	10.0454	4.03629	21.5698	5.21176	65.7131	11.4073	5909.67	0.467465	13.7366	25.7995	72.9384
91500std		32.6462	66.5505		19.3714	8.81343	304.692	4.13812	136.001	1.39266	0.00209759	2.22253	0.00841457	0.167542	0.269071	0.210498	2.02435	0.767125	10.0149	3.99878	21.7624	5.47525	65.9775	11.7153	5936.85	0.501953	14.2388	27.0461	75.846
91500std		32.9356	66.2663		24.036	0	307.607	3.45085	135.651	1.45701	0.00139499	2.11819	0.00894698	0.133831	0.284411	0.198887	2.0146	0.726928	10.1902	4.10389	21.9003	5.46384	66.3419	11.5159	5892.99	0.471796	13.9904	27.0381	75.2489
91500std		32.6981	66.503		20.0986	0	306.89	4.30169	135.845	1.46992	0.00215718	2.15221	0.00310701	0.170135	0.439864	0.205865	1.89231	0.740396	10.1855	4.16791	21.8009	5.41119	65.0574	11.5045	5906.96	0.513935	14.1294	26.9546	75.8497
91500std		32.6761	66.5245		21.3007	0	302.078	4.0303	132.994	1.39767	0.00143517	2.19278	0.0120483	0.14086	0.368241	0.204592	1.87251	0.696647	10.0663	3.95039	21.4865	5.47428	64.1345	11.461	5922.29	0.491617	14.0159	26.4457	74.7
91500std		32.8881	66.3078		4.4211	0	301.6	3.94493	136.847	1.27286	0.00428981	2.17673	0.00974687	0.138085	0.363203	0.186793	2.13071	0.693795	10.1986	3.99054	21.8258	5.33317	66.4204	11.6965	5985.09	0.478035	14.3948	27.4116	77.1755
GJ-600		32.4647	66.6635		29.2778	0	311.44	3.61144	241.356	1.93357	0.00164693	19.109	0.0374614	0.743067	1.72352	1.09067	7.10141	1.85018	19.1539	6.09753	26.4526	5.32122	60.3928	10.6655	6144.68	0.342864	23.8057	21.2601	254.306
GJ-600		32.6644	66.4667		38.3812	0	309.352	5.6436	239.86	1.94769	0.00206952	19.3694	0.0415648	0.856604	1.54103	1.05131	7.09031	1.90259	18.614	6.19256	26.7737	5.38533	59.8421	10.5983	6102.23	0.347532	24.1125	21.4918	256.652
GJ-600		32.4525	66.6677		36.3238	129.371	309.193	5.01033	240.667	1.91167	0.00413466	19.084	0.0521867	0.781536	1.81379	0.956941	7.5042	1.83054	18.9237	5.96088	26.6171	5.30003	59.0891	10.6143	6052.98	0.371452	23.6513	20.894	251.36
GJ-600		32.8648	66.2762		32.9159	0	305.75	4.72253	238.707	1.9488	0	19.1053	0.0364473	0.737371	1.67638	1.00787	7.05829	1.87163	19.0948	6.05802	26.2477	5.42596	59.8623	10.7206	6040.82	0.329571	23.702	21.209	253.124
GJ-600		32.8414	66.3022		28.1051	11.862	303.991	4.29499	238.903	1.80086	0	18.8972	0.0403311	0.819822	1.93398	1.02337	7.19829	1.8083	18.8562	5.92497	26.0441	5.29911	58.8611	10.5399	6023.08	0.36602	23.5201	21.1147	250.37
GJ-600		32.9001	66.2462		36.6096	0	302.292	4.50111	233.978	1.80483	0.00348898	18.7314	0.0433476	0.771367	1.69954	1.04608	6.87243	1.80968	18.7078	6.07111	26.171	5.47664	58.1921	10.4439	6009.57	0.32818	23.1902	20.8387	247.803
Ple-337		33.4161	64.86		474.135	187.332	350.133	23.3827	313.944	4.15484	0.603574	4.33364	0.467722	3.03047	2.47537	0.540786	8.09953	2.93736	31.7209	8.51824	30.7605	5.12372	43.0127	5.02739	11590.7	2.4256	38.0156	68.3296	714.961
Ple-337		33.5672	64.7045		501.299	232.449	345.73	21.6657	310.527	4.10773	1.16004	5.6477	0.610168	3.83567	2.5504	0.499853	8.24375	2.8688	30.9906	8.52081	30.873	5.07612	42.8408	4.83368	11510.3	2.56989	39.4645	70.2561	728.112
Ple-337		33.1378	65.1162		529.69	95.8974	358.198	21.4409	430.201	4.76562	0.516572	4.20706	0.41093	2.92888	2.92678	0.716597	9.67286	3.72538	41.9082	11.7003	42.7584	7.13989	59.4555	7.10659	11347.1	2.7817	49.4784	77.9175	916.688
SRM 610		69.983	0.0631765		436.892	81690.3	439.673	453.706	519.171	419.407	455.772	452.551	430.544	432.341	452.996	459.948	445.721	443.078	446.375	456.756	456.516	437.837	546.51	450.929	441.923	453.3	425.996	493.624	520.558
SRM 610		69.983	0.0631765		436.892	81690.3	439.673	453.706	519.171	419.407	455.772	452.551	430.544	432.341	452.996	459.948	445.721	443.078	446.375	456.756	456.516	437.837	546.51	450.929	441.923	453.3	425.996	493.624	520.558
SRM 610		69.983	0.0631765		436.892	81690.3	439.673	453.706	519.171	419.407	455.772	452.551	430.544	432.341	452.996	459.948	445.721	443.078	446.375	456.756	456.516	437.837	546.51	450.929	441.923	453.3	425.996	493.624	520.558
SRM 612		72.7832	0.00565981		59.375	86294	44.0224	38.4647	45.0385	34.9423	37.6701	38.3263	36.8497	35.0022	38.4819	37.7729	39.0785	38.6535	37.8531	40.0022	39.8133	38.1876	47.5419	38.6114	38.5774	38.2385	38.8176	42.092	42.4568
SRM 612		72.6588	0.00433313		39.2256	87218.1	42.7327	36.8138	45.01	36.1077	38.6048	38.9799	37.5595	36.4115	38.4831	37.701	39.1539	39.1262	38.6689	40.2954	40.2738	38.7024	47.5607	39.0901	39.709	38.7636	38.7321	42.8108	42.642
Uncertainty (1 Sigma)		SiO2	ZrO2		P	Ca	Sc	Ti	Y	Nb	La	Ce	Pr	Nd	Sm	Eu	Gd	Tb	Dy	Ho	Er	Tm	Yb	Lu	Hf	Ta	Pb	Th	U
		29	91		31	42	45	49	89	93	139	140	141	146	147	153	157	159	163	165	166	169	172	175	178	181	Total	232	238
		wt%	wt%		ppm	ppm	ppm	ppm	ppm	ppm	ppm	ppm	ppm	ppm	ppm	ppm	ppm	ppm	ppm	ppm	ppm	ppm	ppm	ppm	ppm	ppm	ppm	ppm	ppm
91500		0.655012	1.65397		5.4267	40.9369	7.91586	0.567101	3.25519	0.0623134	0.00153375	0.0665451	0.00321681	0.0279542	0.0418351	0.0196355	0.097968	0.0292083	0.299708	0.119354	0.58717	0.150612	1.6675	0.281037	151.139	0.0229226	0.209152	0.632421	1.74382
91500		0.618078	1.61371		5.15931	40.5336	7.58678	0.518886	3.32446	0.0632316	0	0.0761875	0.00377186	0.026878	0.0416601	0.0166658	0.113525	0.0292522	0.278627	0.114827	0.529686	0.139311	1.67057	0.297606	150.03	0.0213618	0.237011	0.645448	1.76784
91500		0.669267	1.64011		5.20438	43.1891	7.99425	0.497606	3.23271	0.0561753	0.000987593	0.0726462	0.00287111	0.0286286	0.0499687	0.0178426	0.0976671	0.0301486	0.290611	0.112415	0.591034	0.151855	1.81164	0.289077	148.716	0.0223261	0.248851	0.704695	1.88933
91500		0.669799	1.71461		6.28754	49.0063	8.40658	0.520442	3.49439	0.0610436	0.00121099	0.0751516	0.00211257	0.028743	0.0446776	0.0172206	0.115326	0.0276437	0.327206	0.117619	0.634585	0.157645	1.72689	0.301436	156.415	0.0254753	0.23489	0.673179	1.87227
91500		0.689199	1.72739		5.65119	47.5608	8.59296	0.47967	3.3761	0.0555688	0.00071125	0.071078	0.00397451	0.0279203	0.0529418	0.0187377	0.102696	0.0325264	0.314359	0.122172	0.608956	0.14508	1.7415	0.302968	152.534	0.0229893	0.219043	0.6748	1.876
91500		0.650628	1.59658		5.56796	39.6528	7.61767	0.560685	3.22029	0.061127	0.000701121	0.0679352	0.00273092	0.024669	0.0382109	0.0162809	0.110232	0.0275801	0.29432	0.102402	0.562585	0.14277	1.62368	0.270869	142.595	0.0199628	0.222004	0.644256	1.81098
91500		0.67813	1.6867		5.34286	41.0871	8.303	0.528199	3.36423	0.0599372	0.00211381	0.0692761	0.0030747	0.0285886	0.0413657	0.0179293	0.115084	0.0311742	0.344519	0.12181	0.61653	0.160707	1.8254	0.289253	153.112	0.0215066	0.224244	0.68237	1.86167
91500		0.642475	1.66301		4.64544	43.7472	7.91893	0.589024	3.38216	0.0583654	0.00155863	0.0722648	0.00279582	0.0267453	0.0380284	0.019286	0.114849	0.0310991	0.289698	0.111964	0.535641	0.145312	1.7378	0.27742	144.008	0.0228999	0.209553	0.638876	1.73151
91500		0.593327	1.50794		4.77682	45.9497	7.83116	0.560319	3.16178	0.0589311	0.00139499	0.0690326	0.00293173	0.0227207	0.0447633	0.0185583	0.102788	0.031336	0.323539	0.106646	0.57537	0.143954	1.60649	0.267828	135.467	0.0212401	0.207745	0.643467	1.8021
91500		0.718879	1.67739		4.79803	48.1118	8.62519	0.613002	3.51434	0.0572349	0.00160291	0.072026	0.00175535	0.0280105	0.0537052	0.0200712	0.118311	0.0306896	0.319054	0.12237	0.63265	0.161447	1.79688	0.316851	154.963	0.020619	0.249015	0.717132	2.03613
91500		0.606608	1.68118		4.50482	42.8672	7.77367	0.587962	3.28766	0.0532559	0.00101091	0.0778828	0.00423122	0.0274666	0.0456845	0.0174682	0.117623	0.0309738	0.314796	0.108581	0.591377	0.151187	1.70022	0.282379	145.376	0.0236437	0.230685	0.664596	1.7641
91500		0.623077	1.71927		5.08031	45.7372	8.04753	0.518922	3.51729	0.0583339	0.00223821	0.0753346	0.00274634	0.0263638	0.0548799	0.0173899	0.128551	0.0292482	0.303056	0.106941	0.525857	0.133361	1.78559	0.3005	159.957	0.0237575	0.240365	0.704118	1.84979
GJ-600		0.578862	1.57094		5.69819	44.8464	7.39686	0.550329	5.73543	0.0685406	0.00217424	0.48175	0.00534883	0.0544579	0.103859	0.0455507	0.267389	0.0589152	0.49766	0.15356	0.680279	0.136214	1.52994	0.256075	147.368	0.0173266	0.39082	0.499	5.64189
GJ-600		0.593877	1.64505		4.94283	38.6243	7.63029	0.60877	5.79343	0.0713066	0.00153777	0.49515	0.00592708	0.0526704	0.0919829	0.0506983	0.253535	0.057675	0.516099	0.16193	0.672086	0.138328	1.45876	0.265417	148.455	0.0183207	0.406482	0.516849	6.01478
GJ-600		0.629579	1.62239		5.43212	38.9046	7.80394	0.567276	5.82745	0.0741936	0.00215726	0.488817	0.00698072	0.0618736	0.11323	0.0451801	0.251028	0.0546741	0.495986	0.160314	0.660067	0.141503	1.57383	0.256111	150.093	0.0198085	0.386493	0.500611	5.76957
GJ-600		0.619963	1.53507		5.61769	39.6881	7.23214	0.600194	5.35308	0.0746981	0.000974941	0.469042	0.00491969	0.0593503	0.0925029	0.0447689	0.257457	0.0622252	0.501918	0.150142	0.618596	0.145788	1.54236	0.252114	141.564	0.0159563	0.377378	0.526974	5.95593
GJ-600		0.577744	1.57849		4.37538	38.8295	7.27174	0.559181	5.63581	0.068513	0.00150774	0.495098	0.0057696	0.0662703	0.125477	0.043843	0.222679	0.0569397	0.496986	0.154682	0.629877	0.132408	1.45768	0.243239	146.144	0.0201634	0.384108	0.509534	5.62643
GJ-600		0.560034	1.48819		5.21718	42.7361	7.11905	0.604052	5.33179	0.0654285	0.00182785	0.457409	0.00568256	0.0640499	0.0918302	0.0426588	0.228588	0.0562626	0.502325	0.157957	0.629047	0.143549	1.45215	0.25373	136.814	0.0157213	0.357566	0.50866	5.54005
Ple-337		0.840172	2.1657		16.2892	47.459	12.091	1.47164	10.4816	0.161618	0.0760723	0.240926	0.0403285	0.206933	0.133781	0.0372629	0.36222	0.106222	1.14184	0.296372	1.07584	0.181875	1.57841	0.173998	397.088	0.0914333	0.773985	2.3006	23.1834
Ple-337		1.00753	2.21714		22.1653	60.5921	12.268	1.38784	10.7991	0.165486	0.161636	0.425361	0.0562928	0.275397	0.146189	0.0365447	0.377515	0.118561	1.18923	0.308054	1.15572	0.199723	1.60278	0.166088	409.321	0.0993097	1.01749	2.63709	26.1105
Ple-337		0.825112	2.25746		16.4317	50.5556	12.5058	1.44059	14.9846	0.194059	0.0790382	0.231314	0.0321129	0.168644	0.16486	0.0399441	0.405942	0.149942	1.55042	0.410295	1.46336	0.283851	2.18317	0.269148	402.886	0.112245	1.14687	2.8495	31.2339
Ple-337		0.778603	2.13612		11.039	44.6208	11.1032	1.17545	10.3707	0.143782	0.0119784	0.13859	0.0197186	0.150262	0.154793	0.0339863	0.347347	0.104248	1.07763	0.291652	1.02161	0.183906	1.47311	0.173869	383.016	0.0919913	0.838749	2.38643	23.113
SRM 610		2.09232	0.0021946		16.0282	2716.43	15.0176	16.5988	18.3101	14.0774	15.739	15.1853	14.745	14.8449	15.7239	15.8172	15.4917	15.2881	15.4202	15.5547	15.5987	14.8954	18.8865	15.6974	15.2925	15.6189	8.25053	16.792	16.4785
SRM 610		2.09855	0.00218019		16.3457	2845.31	15.2222	16.1377	17.6972	13.0853	14.3627	14.1094	13.8839	14.1673	14.6631	15.6002	15.3523	15.4813	15.5129	15.7874	15.7207	15.1932	18.9177	15.4054	14.8576	14.6546	7.81324	16.6928	16.5862
SRM 610		2.05515	0.0022113		14.386	2813.54	15.0758	16.8122	18.541	14.1021	15.8445	15.588	14.9746	14.9774	15.5947	16.0725	15.7286	15.2256	15.3446	15.8511	15.9933	15.3361	19.3433	16.1851	15.9964	15.8813	8.17826	16.896	16.5446
SRM 612		2.37854	0.000239164		7.95977	3140.46	1.65004	2.12387	1.68932	1.23998	1.36265	1.40989	1.2986	1.37808	1.52975	1.37714	1.51802	1.38143	1.45236	1.43202	1.46457	1.44285	1.78607	1.44946	1.47285	1.39232	0.815731	1.53618	1.50781
SRM 612		2.14716	0.000215856		7.40193	2931.73	1.46266	2.13227	1.54591	1.20724	1.3412	1.31641	1.27259	1.33775	1.40207	1.26613	1.459	1.29004	1.37388	1.32891	1.35124	1.29584	1.67231	1.32807	1.38515	1.28967	0.7619	1.41477	1.36757
Detection Limit		SiO2	ZrO2		P	Ca	Sc	Ti	Y	Nb	La	Ce	Pr	Nd	Sm	Eu	Gd	Tb	Dy	Ho	Er	Tm	Yb	Lu	Hf	Ta	Pb	Th	U
		29	91		31	42	45	49	89	93	139	140	141	146	147	153	157	159	163	165	166	169	172	175	178	181	Total	232	238
		wt%	wt%		ppm	ppm	ppm	ppm	ppm	ppm	ppm	ppm	ppm	ppm	ppm	ppm	ppm	ppm	ppm	ppm	ppm	ppm	ppm	ppm	ppm	ppm	ppm	ppm	ppm
91500		0.197536	1.14356e-05		22.8236	220.291	0.326187	1.47074	0	0	0	0	0	0	0	0	0.0454663	0.00969505	0	0.00987341	0.01461	0	0	0	0	0	0.0725655	0	0
91500		0.206312	0		28.8637	261.128	0.30475	0.880562	0	0	0	0.0191362	0.00502708	0	0.0346566	0.0192394	0	0	0	0	0.0289806	0.00462099	0	0	0	0	0.0682962	0	0
91500		0.214458	0		25.4994	219.295	0.358264	1.3138	0	0	0	0.0065185	0	0	0	0.0097832	0	0	0	0	0	0	0.0263501	0	0.333563	0.00672704	0.0621839	0	0
91500		0.206176	2.32393e-05		23.4283	200.407	0.372634	1.77506	0	0	0	0.0130984	0.00515103	0	0.0356837	0	0	0	0	0	0	0	0.0529591	0.0110872	0	0.0145302	0.0613079	0.00457339	0
91500		0.163854	1.16632e-05		23.5495	275.881	0.329608	2.13565	0	0	0	0.00658378	0.00517105	0	0	0	0	0	0	0	0.0149878	0.00479522	0	0.00505972	0	0	0.0818108	0	0.00594463
91500		0.220281	1.14981e-05		32.2501	243.468	0.315543	2.19735	0	0	0.00680187	0	0.0101975	0	0	0	0	0	0	0	0	0	0	0	0.0165887	0.00481812	0.0695155	0	0
91500		0.238896	1.62582e-05		25.9811	179.957	0.269918	0.787305	0	0	0	0	0	0	0	0.019727	0	0	0	0	0	0	0	0	0	0	0.071832	0.00462586	0
91500		0.202137	0		26.5201	229.245	0.311376	1.37377	0.0106622	0	0	0	0	0	0.0354068	0	0	0	0.0284507	0	0	0.00946541	0	0	0.033107	0.00960021	0.0799729	0.00456151	0.00419905
91500		0.187134	1.14624e-05		21.3085	225.373	0.284371	1.72972	0	0	0	0	0	0	0	0	0	0	0	0	0	0	0	0	0	0.00478394	0.0744072	0.00458212	0.00929438
91500		0.277143	0.00105213		24.3938	261.309	0.278461	1.24942	0.0109987	0	0	0	0.00526504	0	0	0.0100499	0	0	0	0	0	0	0	0	0	0	0.062842	0.00472653	0
91500		0.181938	0		26.639	227.503	0.318146	1.68062	0.0220148	0	0	0	0.00889255	0.0312531	0	0	0	0.00507853	0	0	0	0	0	0	0	0	0.0659998	0	0
91500		0.209246	0		31.5884	245.039	0.328995	1.08915	0	0.00921679	0	0	0	0	0	0.0200847	0	0.0070672	0	0	0.0151418	0	0	0.00507346	0	0.0048984	0.0777308	0.0104793	0.00602844
GJ-600		0.196139	0		25.4059	218.59	0.305085	1.93576	0	0	0.0130429	0	0.00690719	0.0640235	0	0.00946618	0.0317938	0	0.0195484	0	0	0	0	0	0.0673426	0.00462146	0.0587189	0	0.00404087
GJ-600		0.197383	0		28.7562	227.574	0.379637	0.735783	0	0	0	0	0	0	0	0	0.0324328	0	0	0	0	0	0.0259201	0.00490527	0.0327907	0	0.0680785	0	0
GJ-600		0.219344	0		27.0507	205.963	0.30491	1.05805	0	0	0	0	0	0	0	0	0	0.00957376	0	0.00490149	0	0	0	0	0	0	0.0825203	0	0
GJ-600		0.213173	0		25.1881	223.468	0.301297	1.30385	0	0.00888078	0.00671391	0	0	0	0	0.0134413	0	0	0	0	0	0	0	0	0.0327704	0	0.0843958	0	0.00415706
GJ-600		0.168542	0		23.2426	178.461	0.286463	1.22099	0	0	0.013289	0.00635158	0	0	0	0.0095761	0	0	0	0	0	0	0.035786	0	0	0	0.088983	0.00450461	0
GJ-600		0.190058	0.000229656		25.2984	190.632	0.267554	1.36333	0	0	0	0	0	0	0	0	0	0	0	0	0	0	0	0	0.0230924	0	0.0773497	0	0.00843139
Ple-337		0.209145	0.000304836		25.5149	225.964	0.283825	1.55187	0	0	0.0142555	0.00686042	0.0108103	0	0	0.0144322	0	0	0	0.0105314	0.0155871	0	0	0.00522095	0	0	0.0892181	0	0.0105828
Ple-337		0.24224	1.33924e-05		28.974	268.866	0.402648	1.10272	0	0	0.00787032	0	0	0	0	0	0	0.00567108	0	0	0	0	0	0	0.0193077	0	0.0958675	0	0.00486722
Ple-337		0.148029	2.49572e-05		31.245	191.317	0.405181	1.76851	0.0115873	0	0.0102955	0	0	0	0.0384872	0	0	0	0.0442568	0	0	0.0113811	0	0	0	0	0.0750288	0	0
Ple-337		0.214095	0.000341004		24.6636	205.376	0.238896	1.86421	0	0	0.0147692	0.0141276	0	0	0	0.0149136	0	0	0.0225644	0	0.035666	0	0	0.0150823	0.0180423	0	0.0759237	0.00503555	0.0045956
SRM 610		0.230404	0		36.096	343.946	0.436215	1.01167	0	0	0	0.0177017	0.0139547	0	0	0.0133577	0	0	0.0275506	0	0.0280628	0.0128184	0	0	0	0	0.0904677	0.0061749	0
SRM 610		0.261971	0		37.9997	240.861	0.41729	1.63628	0	0	0.0335199	0.0125313	0	0	0.0980391	0	0.100478	0	0.0559492	0	0.057051	0	0.0507808	0	0.0458885	0	0.0897897	0	0
SRM 610		0.24006	0		30.6132	351.039	0.402809	1.32212	0.0149749	0	0	0	0.00716807	0	0	0	0.102057	0	0	0	0	0.00665074	0	0.0097118	0.11601	0	0.0877474	0.00643086	0.0353797
SRM 612		0.25995	0		46.447	360.464	0.567668	3.23219	0.0167806	0.0139508	0.0211128	0	0	0	0	0	0.103107	0	0	0	0	0	0	0	0	0	0.130427	0.0142035	0
SRM 612		0.252666	0.00343688		38.6163	316.502	0.563448	0.914034	0	0	0.0210911	0	0	0	0.0552418	0	0	0	0.0323138	0	0	0.00741714	0	0	0	0	0.0953309	0.00720778	0
SRM 610		70.0086	0.0594352		434	82190.5	441	434	450	419	457	448	430	431	451	461	444	443	427	449	426	420	445	435	432	452		457.2	461.5	0	0	0	0	0
SRM 612		71.9088	0.00513304		51	85049.3	41	44	38	40	35.8	38.7	37.2	35.9	38.1	35	36.7	36	36	38	38	38	39.2	36.9	35	40		37.79	37.38	0	0	0	0	0
91500		32.659	66.143		#VALUE!	#VALUE!	#VALUE!	4.7	140	0.79	0.006	2.56	0.024	0.24	0.5	0.24	2.21	0.86	11.8	4.84	24.6	6.89	73.9	13.1	5939	0.5		29.9	80	0	0	0	0	0
