# Supplementary material for: Whole-rock and zircon evidence for evolution of the Late Jurassic high-Sr ∕ Y Zhoujiapuzi granite, Liaodong Peninsula, North China Craton
Source: Copernicus journal article supplement (doi:10.5194/se-13-1259-2022), 2022-08-12
Supplement: Supplementary file 4 [file Table S4.xlsx]

## Sheet: zrc samples
Table S4. Zircon La-ICP-MS U-Pb isotopic data and ages of the Zhoujiapuzi granite
Analysis	Spot type	Pb	Th	U	Th/U	207Pb/206Pb		207Pb/235U		206Pb/238U		207Pb/206Pb		207Pb/235U		206Pb/238U
		ppm				Ratio	2sigma	Ratio	2sigma	Ratio	2sigma	Age (Ma)	2σ	Age (Ma)	2σ	Age (Ma)	2σ
XY-001-01	IC	181.526	221.2	365.421	0.605328	0.134959	0.00104372	7.26878	0.228987	0.390621	0.0120387	2196.3	11.9829	2144.98	67.573	2125.71	65.513
XY-001-02	DR	35.1218	41.5053	1395.03	0.0297523	0.0491214	0.00103726	0.169843	0.0062787	0.0250768	0.00081626	153.628	48.7228	159.282	5.88831	159.662	5.19706
XY-001-03	DR	39.7332	79.0921	1552.38	0.0509488	0.0481758	0.000962703	0.162292	0.00575083	0.0244323	0.000766241	107.912	46.5336	152.708	5.4112	155.608	4.88013
XY-001-04	LC	10.2369	112.172	357.188	0.314043	0.0496763	0.00201365	0.173398	0.0080058	0.0253157	0.000809728	179.877	91.8431	162.363	7.49634	161.164	5.15487
XY-001-06	LC	9.24539	115.442	324.755	0.355474	0.0496746	0.00226847	0.172957	0.00855805	0.0252523	0.000815135	179.794	103.109	161.982	8.01499	160.765	5.18945
XY-001-07	LC	11.1095	153.234	377.141	0.406304	0.0482931	0.00217461	0.172975	0.00851949	0.0259773	0.000844752	113.652	102.94	161.998	7.97882	165.323	5.37609
XY-001-09	DR	6.76215	120.28	214.079	0.56185	0.048037	0.00291623	0.169028	0.0102589	0.0255198	0.0008826	101.089	137.623	158.575	9.62447	162.447	5.61822
XY-001-11	DR	23.6315	202.435	895.026	0.226178	0.0495302	0.00150338	0.166558	0.00667734	0.0243889	0.000765373	173.007	69.3409	156.428	6.2712	155.334	4.8747
XY-001-12	LC	2.66489	43.131	83.9594	0.513713	0.0558714	0.00609608	0.19447	0.0187874	0.0252441	0.000918527	447.263	225.725	180.436	17.4316	160.714	5.8477
XY-001-13	DR	51.3537	268.103	1984.16	0.135121	0.0492364	0.000962005	0.16855	0.00598959	0.0248278	0.000785762	159.102	45.087	158.16	5.62036	158.096	5.00349
XY-001-14	DR	47.6004	83.5532	1776.48	0.0470331	0.0498696	0.000886236	0.178256	0.0061909	0.0259241	0.000815622	188.921	40.8368	166.558	5.78465	164.988	5.19084
XY-001-15	DR	45.1382	384.894	1631.31	0.235941	0.0488824	0.00097868	0.167912	0.00595184	0.0249129	0.000781228	142.194	46.328	157.605	5.5865	158.631	4.97441
XY-001-16	LC	5.13407	38.5402	181.25	0.212636	0.0464855	0.00302173	0.165226	0.0103539	0.0257784	0.000848172	22.8742	149.048	155.267	9.72985	164.073	5.39838
XY-001-17	DR	39.6143	362.38	1484.45	0.244117	0.0490493	0.00109006	0.169558	0.00641974	0.0250716	0.00082872	150.186	51.2707	159.035	6.02133	159.629	5.2764
XY-001-18	LC	9.3488	208.991	293.041	0.713179	0.0471909	0.00225217	0.167041	0.00851442	0.0256721	0.000836541	58.8989	109.997	156.848	7.99485	163.404	5.32463
XY-001-19	DR	67.6434	239.428	2564.72	0.0933546	0.0487592	0.000813362	0.168621	0.00578875	0.0250813	0.000788173	136.266	38.7325	158.221	5.43174	159.69	5.01822
XY-001-20	LC	15.5753	133.973	561.456	0.238618	0.0495951	0.00166084	0.171456	0.00720136	0.0250732	0.000795396	176.059	76.296	160.682	6.74883	159.639	5.06423
XY-001-22	DR	32.538	47.2654	1287.75	0.0367039	0.0482811	0.00114301	0.168462	0.00638281	0.0253059	0.000820772	113.065	54.9337	158.084	5.98957	161.102	5.2252
XY-001-23	LC	20.9132	95.8663	787.494	0.121736	0.0484496	0.0015144	0.165842	0.00679882	0.0248256	0.000792549	121.283	72.0378	155.804	6.3873	158.082	5.04671
XY-001-24	LC	4.89984	88.3199	158.836	0.556044	0.0462636	0.00338467	0.162487	0.0112068	0.0254728	0.000864897	11.3774	167.181	152.878	10.544	162.151	5.50566
XY-001-25	DR	60.4938	187.23	2302.34	0.0813214	0.0489237	0.000861703	0.166783	0.00575737	0.0247246	0.000773822	144.174	40.8105	156.623	5.40665	157.446	4.92771
XY-001-26	DR	60.8542	432.125	2278.52	0.189652	0.0488779	0.000874492	0.16707	0.00577508	0.0247903	0.000774594	141.98	41.4635	156.873	5.4226	157.86	4.93246
XY-001-28	DR	26.8071	113.683	1018.81	0.111584	0.0491475	0.00134974	0.177036	0.00713594	0.026125	0.000869747	154.874	63.0725	165.507	6.67122	166.251	5.53476
XY-001-30	LC	4.8313	67.0131	161.399	0.415202	0.0464775	0.00296717	0.164626	0.0102082	0.0256892	0.000852152	22.4619	146.508	154.744	9.59546	163.512	5.42395
XY-001-31	DR	35.9411	101.757	1438.83	0.070722	0.0489515	0.00123903	0.166549	0.0064293	0.0246759	0.000800637	145.51	58.3178	156.42	6.03828	157.14	5.09859
XY-001-33	DR	37.6393	104.356	1440.24	0.0724573	0.0488661	0.00103252	0.168512	0.005987	0.0250103	0.000774817	141.413	48.862	158.127	5.61803	159.243	4.93335
XY-001-34	DR	75.3994	278.02	2875.09	0.0966996	0.0492766	0.000876405	0.171395	0.00588324	0.0252263	0.000782783	161.013	41.0777	160.629	5.51369	160.602	4.98354
XY-001-36	LC	4.14479	63.7161	141.524	0.450212	0.0475197	0.00563587	0.161675	0.0173976	0.0246709	0.000947079	75.4225	260.019	152.168	16.3746	157.109	6.03117
XY-001-37	IC	172.916	229.722	336.936	0.681797	0.135709	0.00186895	7.27349	0.254769	0.388642	0.0128416	2204.97	20.2845	2145.56	75.1527	2116.53	69.9349
XY-001-40	LC	18.0637	157.012	625.306	0.251097	0.0478129	0.00254002	0.170034	0.00977175	0.0257874	0.000921429	90.0208	121.296	159.449	9.1634	164.129	5.86462
XY-001-43	DR	27.6699	177.64	989.499	0.179525	0.0481312	0.0022812	0.168797	0.00889851	0.0254304	0.000868486	105.724	108.33	158.374	8.34906	161.885	5.52862
XY-001-44	LC	5.99082	102.842	191.832	0.536103	0.0527355	0.00446982	0.187391	0.0153178	0.0257668	0.0010054	317.433	182.024	174.4	14.256	164	6.39915
XY-001-45	DR	34.5504	45.9863	1282.54	0.0358556	0.0479157	0.00183086	0.170892	0.00802938	0.0258619	0.000880789	95.1084	88.0599	160.193	7.52668	164.597	5.60575
XY-001-46	DR	44.3255	47.1782	1652.48	0.0285499	0.0493796	0.00155869	0.174436	0.00777459	0.0256156	0.000913839	165.894	72.1439	163.262	7.27654	163.049	5.8168
XY-001-47	IC	271.185	296.313	459.912	0.644282	0.164297	0.00179295	10.0093	0.333261	0.441765	0.0141347	2499.67	18.2385	2435.64	81.0947	2358.54	75.4638
XY-001-48	DR	30.6671	61.6203	1105.88	0.0557206	0.0492919	0.00200254	0.176322	0.008609	0.0259385	0.000898386	161.741	92.3448	164.891	8.05086	165.079	5.71753
XY-001-49	IC	124.549	142.174	231.975	0.612886	0.134912	0.00183179	7.76851	0.286566	0.417544	0.0146458	2195.75	20.6934	2204.57	81.3224	2249.32	78.8973
XY-001-53	IC	179.596	221.704	354.69	0.625065	0.133047	0.00183241	7.09226	0.241918	0.38654	0.0123933	2172.99	22.38	2123.07	72.4183	2106.76	67.5473
XY-008-02	LC	9.0986	121.74	312.748	0.38926	0.0473774	0.00214151	0.166393	0.00820215	0.0254717	0.000825947	68.2928	104.182	156.283	7.70383	162.145	5.25771
XY-008-03	DR	58.1166	171.993	2267.55	0.0758499	0.0491536	0.000922871	0.166763	0.00577001	0.024606	0.000761502	155.163	43.3801	156.606	5.41857	156.7	4.84954
XY-008-04	LC	4.19734	50.4219	145.61	0.34628	0.0512394	0.00329033	0.176795	0.0110154	0.0250242	0.000831855	251.616	141.377	165.299	10.2992	159.331	5.29649
XY-008-05	DR	53.4847	14.7576	2171.77	0.0067952	0.049084	0.000849421	0.164775	0.00575185	0.0243471	0.00077454	151.846	40.0497	154.874	5.40624	155.071	4.93319
XY-008-06	IC	115.795	110.041	254.837	0.431807	0.135571	0.00128402	6.91458	0.221763	0.369908	0.0114921	2203.41	14.2441	2100.53	67.3678	2028.97	63.035
XY-008-07	LC	17.9044	171.265	638.08	0.268406	0.0496772	0.00150578	0.173142	0.00701384	0.0252779	0.00080677	179.915	69.1617	162.142	6.56825	160.926	5.13613
XY-008-08	LC	6.63525	93.5244	231.354	0.404249	0.0516505	0.00291358	0.178293	0.010082	0.0250354	0.000813092	269.966	124.436	166.59	9.42027	159.402	5.17699
XY-008-09	IC	439.829	640.979	852.608	0.751787	0.134721	0.000681401	7.22109	0.226072	0.388744	0.0120448	2193.49	7.9681	2139.11	66.9695	2117	65.5932
XY-008-10	DR	88.0949	364.598	3354.12	0.108702	0.0485513	0.00066913	0.167152	0.00551643	0.0249694	0.000773165	126.218	32.1255	156.945	5.17955	158.986	4.92293
XY-008-11	LC	4.89985	93.82	156.222	0.600554	0.0487401	0.00343159	0.169733	0.0113296	0.0252566	0.000844705	135.349	157.595	159.187	10.6257	160.793	5.37769
XY-008-12	LC	12.8882	133.773	451.448	0.29632	0.0505695	0.00184269	0.174841	0.00764125	0.0250756	0.000798283	221.254	82.1797	163.612	7.15048	159.654	5.0826
XY-008-13	DR	65.7607	875.291	2371.93	0.36902	0.049168	0.00083249	0.167414	0.00582079	0.0246948	0.000785211	155.849	39.166	157.172	5.4647	157.259	5.0003
XY-008-14	LC	7.50425	95.2998	249.219	0.382393	0.0495675	0.00245805	0.177502	0.00935451	0.0259718	0.000867846	174.764	111.771	165.909	8.74354	165.288	5.52308
XY-008-15	DR	33.5942	321.634	1243.47	0.258658	0.0494573	0.00108455	0.16646	0.00602928	0.0244105	0.000766134	169.568	50.4225	156.342	5.6628	155.47	4.8795
XY-008-16	LC	12.9587	64.2416	497.815	0.129047	0.0479725	0.00212957	0.168461	0.00827137	0.0254684	0.000836828	97.9126	101.818	158.082	7.76179	162.124	5.32699
XY-008-17	DR	95.7758	71.2117	3809.21	0.0186946	0.0496346	0.000651185	0.168379	0.00561276	0.0246036	0.000774589	177.919	30.3072	158.011	5.26716	156.685	4.93289
XY-008-18	LC	10.9375	84.718	385.897	0.219536	0.0484896	0.00190678	0.171171	0.00777185	0.0256023	0.000816896	123.224	90.092	160.435	7.28437	162.966	5.19977
XY-008-20	DR	49.2408	83.5984	1916.54	0.0436195	0.048385	0.000926288	0.168017	0.00590091	0.0251848	0.000789788	118.137	44.5223	157.696	5.53845	160.341	5.02825
XY-008-22	DR	65.261	675.407	2393.2	0.28222	0.0485857	0.000828252	0.16408	0.00568232	0.024493	0.000774315	127.888	39.6331	154.268	5.34253	155.989	4.9314
XY-008-24	LC	7.48122	75.8925	269.239	0.281878	0.0481923	0.00223798	0.167419	0.00838567	0.0251954	0.000818036	108.719	106.154	157.176	7.87265	160.408	5.20806
XY-008-26	LC	18.3079	149.928	664.885	0.225495	0.0475749	0.00149005	0.164918	0.00674018	0.0251412	0.000797753	78.1818	72.7537	154.999	6.33479	160.066	5.07906
XY-008-31	LC	7.467	86.8475	252.182	0.344385	0.0471926	0.0023952	0.16768	0.00893199	0.0257692	0.000854353	58.9864	116.733	157.403	8.38458	164.015	5.43775
XY-008-33	DR	41.1333	54.8243	1640.62	0.0334167	0.0503791	0.00117072	0.177616	0.00683508	0.0255698	0.000851229	212.521	52.9701	166.007	6.38834	162.761	5.4184
XY-008-35	DR	35.3742	229.768	1361.83	0.168719	0.0493375	0.00138782	0.170882	0.00670652	0.0251197	0.000796026	163.902	64.4663	160.184	6.28667	159.932	5.06812
XY-008-37	LC	7.03029	41.0112	255.886	0.160271	0.0488146	0.00488394	0.165194	0.0152194	0.0245391	0.000883449	138.937	219.492	155.239	14.3022	156.279	5.62633
XY-008-39	LC	4.15344	70.066	134.678	0.52025	0.0478121	0.00689481	0.168717	0.0217396	0.025588	0.00104309	89.9813	310.283	158.305	20.398	162.876	6.63959
XY-008-40	IC	124.328	139.268	241.193	0.577413	0.134035	0.00194718	7.42774	0.275178	0.401841	0.0140522	2185.24	22.8112	2164.32	80.1823	2177.51	76.1465
XY-008-41	IC	183.321	234.897	354.175	0.663225	0.135803	0.00146931	7.37011	0.244208	0.393531	0.0125346	2206.04	16.0368	2157.35	71.4838	2139.18	68.1362
XY-008-45	LC	3.59761	62.4829	116.784	0.53503	0.0451865	0.00675116	0.157032	0.0210559	0.0251997	0.00111066	183.415	282.668	148.102	19.8585	160.434	7.07106
XY-008-46	DR	33.8001	266.625	1211.95	0.219996	0.0499868	0.00201286	0.169275	0.00804516	0.0245558	0.000812443	194.379	91.0158	158.79	7.54682	156.384	5.17408
XY-008-48	LC	7.87659	91.0587	258.634	0.352075	0.0502738	0.00394259	0.179813	0.0137761	0.0259355	0.000988611	207.672	172.377	167.9	12.8634	165.059	6.29175
XY-008-49	IC	477.59	619.048	894.124	0.692351	0.135454	0.00116951	7.9491	0.287674	0.425542	0.0150954	2202.05	13.0847	2225.27	80.5312	2285.59	81.0777
XY-008-50	DR	2.5231	47.8518	83.5302	0.572869	0.0418106	0.00714787	0.141138	0.0213164	0.0244778	0.00104166	220.44	145.842	134.057	20.247	155.894	6.6341
Spot type: LC- light-CL core; DR- dark-CL rim; IC- inherited core

## Sheet: Reference Materials
Analysis	Pb	Th	U	Th/U	207Pb/206Pb	207Pb/206Pb	207Pb/235U	207Pb/235U	206Pb/238U	206Pb/238U	207Pb/206Pb	207Pb/206Pb	207Pb/235U	207Pb/235U	206Pb/238U	206Pb/238U
	ppm	ppm	ppm		Ratio	2sigma	Ratio	2sigma	Ratio	2sigma	Age (Ma)	2sigma	Age (Ma)	2sigma	Age (Ma)	2sigma
91500	91.5892	32.7731	19.1814		0.0748048	0.00207933	1.8832	0.073395	0.182584	0.00576151	1063.32	54.967	1075.19	41.9039	1081.08	34.1138
91500	93.8359	33.3472	19.1843		0.0748597	0.00205294	1.82	0.0712509	0.176327	0.00563685	1064.8	54.2309	1052.68	41.2114	1046.88	33.4667
91500	92.7534	33.0288	19.1806		0.0741131	0.00200476	1.82853	0.0709896	0.178938	0.00568899	1044.6	53.6581	1055.75	40.9878	1061.17	33.7379
91500	94.5072	34.0644	19.4085		0.0735848	0.00182561	1.80579	0.0675517	0.177982	0.00557826	1030.14	49.386	1047.56	39.1874	1055.94	33.095
91500	95.6	34.4182	19.8366		0.0750084	0.00173072	1.85595	0.0685936	0.179453	0.005685	1068.79	45.7271	1065.55	39.3813	1063.99	33.7066
91500	96.8154	35.0209	20.1092		0.0751672	0.0018684	1.85771	0.0700582	0.179245	0.00567544	1073.04	49.1759	1066.17	40.2076	1062.85	33.653
91500	98.1999	35.5303	20.1271		0.0747582	0.0019875	1.82743	0.0699927	0.177288	0.00557355	1062.07	52.6215	1055.36	40.4214	1052.14	33.077
91500	93.5911	33.8187	19.3869		0.0747157	0.00196869	1.84882	0.0711225	0.179465	0.00569963	1060.92	52.1693	1063.01	40.893	1064.05	33.7932
91500	89.9125	32.417	18.5933		0.0739728	0.00201684	1.82173	0.0709084	0.178611	0.00567852	1040.77	54.1061	1053.31	40.9985	1059.38	33.6806
91500	89.3387	32.3171	18.5245		0.0744557	0.00197643	1.84959	0.0712133	0.180166	0.00570998	1053.9	52.6032	1063.28	40.9387	1067.88	33.8443
91500	90.839	32.1628	18.7915		0.0735486	0.00177288	1.81814	0.068131	0.179287	0.00569488	1029.15	48.0114	1052.01	39.4221	1063.08	33.7676
91500	90.9587	32.7287	18.9462		0.0739237	0.00200189	1.8444	0.0712926	0.180954	0.00571426	1039.43	53.7574	1061.43	41.0281	1072.18	33.858
91500	93.256	33.505	19.5206		0.0722798	0.00192177	1.81785	0.0697192	0.182405	0.0057451	993.859	53.1472	1051.91	40.3434	1080.1	34.0192
91500	95.097	34.4527	20.0129		0.0734976	0.001816	1.85934	0.0699444	0.183477	0.00580347	1027.75	49.2046	1066.75	40.1289	1085.94	34.3489
91500	96.0013	34.8621	20.1573		0.0751482	0.001872	1.88662	0.0714132	0.182079	0.00578927	1072.53	49.2851	1076.39	40.7442	1078.32	34.2856
91500	95.1058	34.874	19.9131		0.0730632	0.00200857	1.81514	0.070621	0.180181	0.00570233	1015.74	54.7451	1050.94	40.8883	1067.96	33.7987
91500	90.3274	32.6838	18.8784		0.0748544	0.00190488	1.8654	0.0707501	0.180738	0.00571279	1064.66	50.3865	1068.9	40.5409	1071.01	33.8525
91500	89.5912	32.6265	19.0027		0.0747836	0.00209575	1.89189	0.0742719	0.183479	0.00582767	1062.75	55.4133	1078.25	42.3298	1085.95	34.4921
91500	87.575	31.4409	18.4755		0.0734602	0.00195626	1.85667	0.0717963	0.183307	0.00583665	1026.72	52.9755	1065.8	41.214	1085.01	34.5478
91500	92.2729	33.82	19.4479		0.0737572	0.00191158	1.85342	0.0706817	0.182249	0.00575961	1034.88	51.5196	1064.65	40.6013	1079.25	34.1075
91500	86.9457	32.0211	18.5684		0.0736062	0.00274809	1.84305	0.0867471	0.181567	0.00633016	1030.73	73.7312	1060.95	49.9359	1075.53	37.4973
91500	92.6907	35.039	19.6239		0.0760583	0.00337396	1.86015	0.0939514	0.177344	0.0059831	1096.69	86.4251	1067.04	53.8934	1052.45	35.5067
91500	91.0421	34.2338	19.6716		0.0750825	0.00277891	1.88158	0.0868608	0.181719	0.00615736	1070.77	72.6938	1074.62	49.6084	1076.36	36.4713
91500	87.0357	32.0553	18.5192		0.0738977	0.00364501	1.82323	0.0994486	0.178907	0.00627107	1038.72	96.58	1053.85	57.4824	1061	37.1903
91500	87.2486	32.1807	18.3545		0.074211	0.00333836	1.81876	0.0943405	0.177714	0.00625369	1047.26	88.2106	1052.24	54.5804	1054.48	37.1066
91500	89.1855	33.4173	19.0365		0.0728928	0.00344886	1.8184	0.0965461	0.180892	0.0062976	1011.01	93.1249	1052.11	55.8607	1071.85	37.3154
91500	87.3047	32.4904	18.6349		0.0749745	0.00334612	1.85211	0.0959824	0.17913	0.00634921	1067.88	87.2821	1064.18	55.1493	1062.22	37.6501
91500	90.9527	34.1106	19.2158		0.0730343	0.00358808	1.80251	0.0983485	0.178964	0.00631334	1014.94	96.5332	1046.37	57.0919	1061.31	37.4401
91500	90.0741	33.7721	18.9033		0.0760023	0.00352514	1.85205	0.0963576	0.176702	0.00602439	1095.21	90.2709	1064.16	55.3657	1048.93	35.7618
91500	88.1381	32.9037	18.8949		0.0755843	0.0033405	1.87949	0.0982998	0.180311	0.00658655	1084.16	86.261	1073.88	56.1655	1068.68	39.0374
91500	86.8697	32.2361	18.4793		0.0719668	0.00313443	1.7747	0.0893279	0.178817	0.00612137	985.027	86.2486	1036.24	52.1582	1060.51	36.304
91500	90.5026	33.7046	19.0613		0.0774293	0.00357788	1.86223	0.0975013	0.174398	0.00606305	1132.39	89.4963	1067.78	55.906	1036.3	36.0275
GJ-600	277.09	22.9083	28.7202		0.0594893	0.00123974	0.803134	0.0287049	0.0979141	0.00306826	585.048	44.6012	598.595	21.3944	602.173	18.8699
GJ-600	278.909	23.0768	28.7916		0.0601439	0.00136838	0.812514	0.0296627	0.0979795	0.00306947	608.756	48.4401	603.863	22.0455	602.557	18.8767
GJ-600	277.196	22.9024	28.646		0.0595798	0.00128543	0.803271	0.0290308	0.0977819	0.0030757	588.35	46.1268	598.672	21.6364	601.397	18.9167
GJ-600	280.305	23.3901	28.9202		0.0612717	0.00137197	0.825495	0.030176	0.0977126	0.00308242	648.786	47.371	611.11	22.3391	600.99	18.9587
GJ-600	276.152	22.9983	28.9671		0.0587819	0.00121656	0.80907	0.0290015	0.0998248	0.00314551	559.029	44.4912	601.932	21.5766	613.382	19.3279
GJ-600	279.617	23.2244	29.3603		0.0589433	0.00138831	0.808355	0.0299032	0.0994634	0.0031322	565.004	50.4864	601.531	22.2523	611.263	19.2493
GJ-600	276.834	22.9161	29.0979		0.059239	0.00133496	0.816188	0.0297598	0.0999261	0.00313542	575.89	48.2488	605.92	22.093	613.976	19.2649
GJ-600	278.713	23.2591	29.2762		0.0602665	0.00140498	0.828672	0.0304959	0.0997247	0.00313048	613.156	49.5799	612.875	22.5544	612.795	19.2364
GJ-600	277.007	23.0642	29.301		0.0596187	0.00132716	0.825903	0.0300833	0.100471	0.00316096	589.764	47.56	611.336	22.2678	617.171	19.417
GJ-600	279.879	23.3001	29.5023		0.0589347	0.00137284	0.809524	0.0299713	0.0996218	0.00315284	564.685	49.9422	602.187	22.295	612.192	19.3747
GJ-600	317.844	27.9693	34.0045		0.0578875	0.00214847	0.783725	0.0357463	0.0981735	0.00324349	525.505	79.3648	587.606	26.8012	603.696	19.9451
GJ-600	311.172	27.6125	33.3281		0.0601767	0.00200258	0.821013	0.035309	0.0989319	0.0032128	609.936	70.3467	608.613	26.1744	608.146	19.7495
GJ-600	308.006	27.2211	32.7224		0.0598288	0.00202821	0.808705	0.0358428	0.0980156	0.00330928	597.388	71.7806	601.727	26.6693	602.769	20.3512
GJ-600	307.865	27.2187	32.6628		0.0598943	0.00204097	0.810178	0.035872	0.0980867	0.00329329	599.757	72.1167	602.554	26.6791	603.186	20.2522
GJ-600	307.76	27.2613	32.564		0.0596262	0.00199139	0.796112	0.0345035	0.096817	0.00317852	590.038	70.8263	594.633	25.7714	595.729	19.5579
GJ-600	293.965	25.8819	30.9517		0.0605333	0.00197498	0.805733	0.034445	0.0965187	0.00314765	622.693	68.8533	600.058	25.6524	593.975	19.3706
Ple-337	963.895	91.0543	54.3255		0.0538936	0.000946631	0.398097	0.0139151	0.0535732	0.00170205	366.606	39.109	340.267	11.8937	336.422	10.6883
Ple-337	927.381	94.9535	53.1956		0.0526681	0.000941839	0.396151	0.0138688	0.0545518	0.00173009	314.527	40.1745	338.853	11.8629	342.407	10.8593
Ple-337	836.874	86.9726	50.7482		0.052536	0.00160334	0.405424	0.0174121	0.0559588	0.00191968	308.808	68.0404	345.575	14.8417	351.002	12.0412
Ple-337	895.561	83.5876	51.4764		0.0534705	0.000893344	0.407233	0.0140056	0.0552364	0.00173887	348.813	37.338	346.881	11.93	346.59	10.9108
Ple-337	941.105	98.9442	53.1334		0.053447	0.000918471	0.394578	0.0138269	0.0535434	0.00171313	347.819	38.3991	337.708	11.834	336.239	10.758
Ple-337	873.491	85.4092	49.2807		0.0525248	0.000917622	0.390805	0.0135168	0.0539624	0.00169546	308.324	39.3026	334.957	11.5852	338.803	10.6449
Ple-337	950.763	102.37	54.0595		0.0532955	0.000882713	0.394914	0.0136836	0.0537412	0.0017088	341.4	37.0667	337.953	11.7099	337.45	10.7298
