# Supplementary material for: Whole-rock and zircon evidence for evolution of the Late Jurassic high-Sr ∕ Y Zhoujiapuzi granite, Liaodong Peninsula, North China Craton
Source: Copernicus journal article supplement (doi:10.5194/se-13-1259-2022), 2022-08-12
Supplement: Supplementary file 5 [file Table S5.xlsx]

## Sheet: zrc samples
Table S5. Zircon Hf isotopic data of the Zhoujiapuzi granite
Sample	Spot type	t/Ma	176Hf/177Hf	2σ	176Lu/177Hf	176Yb/177Hf	εHf（t）	2σ	TDM1(Ma)	TDM2(Ma)
XY-001-03	DR	157	0.281938	7e-06	0.000843	0.026141	-26.14	0.25	1839	2857
XY-001-04	LC	161	0.281921	9e-06	0.000248	0.007767	-26.6	0.33	1835	2889
XY-001-06	LC	160	0.28194	8e-06	0.000615	0.018894	-25.97	0.28	1825	2849
XY-001-12	LC	159	0.281984	1.1e-05	0.000174	0.005473	-24.42	0.39	1746	2751
XY-001-13	DR	157	0.281974	9e-06	0.000737	0.022829	-24.85	0.33	1784	2776
XY-001-15	DR	157	0.281933	8e-06	0.000562	0.017606	-26.28	0.28	1832	2866
XY-001-19	DR	157	0.281977	8e-06	0.000406	0.012403	-24.72	0.29	1765	2768
XY-001-24	LC	161	0.281971	7e-06	0.000572	0.016624	-24.88	0.24	1781	2781
XY-001-25	DR	157	0.281953	9e-06	0.0005	0.015024	-25.58	0.33	1803	2822
XY-001-34	DR	158	0.281956	7e-06	0.000881	0.026427	-25.49	0.24	1816	2817
XY-001-37	IC	2167	0.281496	9e-06	0.001494	0.055776	1.16	0.31	2488	2673
XY-001-47	IC	2494	0.281187	9e-06	0.000911	0.032294	-1.62	0.32	2869	3095
XY-001-49	IC	2167	0.281446	9e-06	0.001571	0.059071	-0.73	0.32	2562	2788
XY-001-53	IC	2167	0.281485	1.1e-05	0.000942	0.034764	1.59	0.39	2466	2646
XY-008-03	DR	158	0.281994	9e-06	0.000658	0.020048	-24.14	0.31	1754	2732
XY-008-04	LC	161	0.281977	1e-05	0.000291	0.008535	-24.6	0.37	1760	2764
XY-008-06	IC	2167	0.281481	1e-05	0.001263	0.046615	0.99	0.35	2492	2683
XY-008-09	IC	2167	0.281465	8e-06	0.001138	0.042533	0.58	0.28	2507	2708
XY-008-12	LC	161	0.28203	8e-06	0.000761	0.022516	-22.79	0.3	1708	2650
XY-008-16	LC	162	0.281999	8e-06	0.000214	0.006456	-23.82	0.29	1727	2716
XY-008-17	DR	158	0.281985	8e-06	0.00087	0.023951	-24.47	0.27	1775	2752
XY-008-24	LC	162	0.282007	8e-06	0.000331	0.009745	-23.54	0.29	1721	2698
XY-008-26	LC	160	0.28203	7e-06	0.000733	0.021592	-22.8	0.24	1707	2650
XY-008-33	DR	160	0.281952	7e-06	0.000862	0.027325	-25.6	0.26	1821	2825
XY-008-41	IC	2167	0.281443	1e-05	0.001449	0.054166	-0.63	0.34	2557	2783
Spot type: LC- light-CL core; DR- dark-CL rim; IC- inherited core

## Sheet: Reference Materials
Sample	176Yb/177Hf	2σ	176Lu/177Hf	2σ	176Hf/177Hf	2σ	178Hf/177Hf	2σ
91500	0.00942466	2.11e-05	0.000335515	2.85e-07	0.282315	1.12e-05	1.46726	3.64e-05
91500	0.00938566	3.28e-05	0.000334426	3.25e-07	0.282305	1.21e-05	1.46727	3.73e-05
GJ-1	0.00656629	1.59e-05	0.000238519	1.64e-07	0.282002	1.15e-05	1.46727	3.31e-05
GJ-1	0.00669306	1.69e-05	0.000243079	1.73e-07	0.282006	1.16e-05	1.46723	3.48e-05
GJ-1	0.00658797	1.6e-05	0.000238465	1.6e-07	0.28201	1.14e-05	1.46725	3.98e-05
GJ-1	0.00678147	1.72e-05	0.000244701	1.72e-07	0.282013	1e-05	1.4672	3.98e-05
GJ-1	0.00677884	1.64e-05	0.000245152	1.51e-07	0.282004	1.08e-05	1.46722	3.81e-05
Mud Tank	0.00262801	6.36e-06	7.611e-05	1.03e-07	0.282523	8.71e-06	1.46722	3.29e-05
Mud Tank	0.00251165	5.63e-06	7.26743e-05	1.07e-07	0.28251	8.27e-06	1.46721	3.66e-05
Penglai	0.0100709	2.56e-05	0.000319154	1.57e-07	0.282914	1.21e-05	1.46724	4.02e-05
Penglai	0.0114069	2.64e-05	0.000360506	2.27e-07	0.282906	1.2e-05	1.46727	3.27e-05
Penglai	0.0099925	1.91e-05	0.00031741	2.82e-07	0.282914	1.11e-05	1.46724	3.71e-05
Penglai	0.00938092	2.33e-05	0.000297421	1.78e-07	0.282901	1.07e-05	1.4672	4.08e-05
Penglai	0.009488	2.45e-05	0.000300892	1.73e-07	0.282909	1.18e-05	1.46717	4e-05
Plesovice	0.00485483	1.02e-05	0.000117455	1.14e-07	0.282479	7.6e-06	1.46729	3.86e-05
Plesovice	0.00483321	1.11e-05	0.000116989	1.03e-07	0.282485	7.18e-06	1.46728	3.38e-05
